# Supplementary material for: Mg0.8Zn0.2O microspheres: preparation, characterization and application for degrading organic dyes
Source: Royal Society of Chemistry journal article supplement (doi:10.1039/c9ce01717h), 2020-01-01
Supplement: c9ce01717h1.pdf [file c9ce01717h1.pdf]

## Electronic Supplementary Information

### **Mg<sub>0.8</sub>Zn<sub>0.2</sub>O Microspheres: Preparation, Characterization and Application for Degrading Organic Dyes**

Yajun Zheng,<sup>[a],[b]</sup> Liyun Cao,<sup>[b]\*</sup> Gaoxuan Xing,<sup>[a]</sup> Jianfeng Huang,<sup>[b]</sup> and Zhiping Zhang<sup>[a],[c]\*</sup>

<sup>[a]</sup> *School of Chemistry and Chemical Engineering, Shaanxi Province Key Laboratory of Environmental Pollution Control and Reservoir Protection Technology of Oilfields, Xi'an Shiyou University, Xi'an 710065, China; Fax: +86 29 8838 2693; Tel: +86 29 8838 2694; E-mail: zhangzp0304@gmail.com (Z. Zhang).*

<sup>[b]</sup> *School of Material Science and Engineering, Shaanxi University of Science and Technology, Xi'an 710021, China; E-mail: caoliyun@sust.edu.cn (L. Cao).*

<sup>[c]</sup> *State Key Laboratory of Petroleum Pollution Control, CNPC Research Institute of Safety and Environmental Technology, Beijing 102206, China*

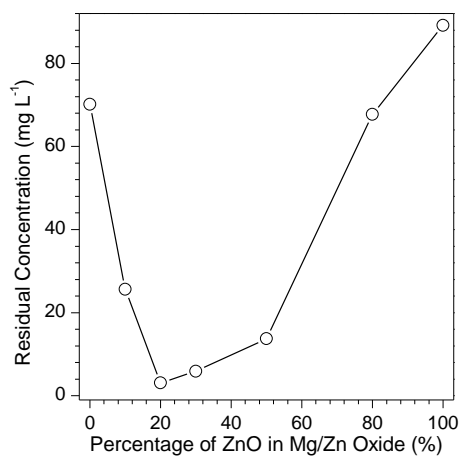

**Figure S1.** Residual concentration of 300 mg L<sup>-1</sup> methylene blue aqueous solution after treatment with Mg/Zn binary oxides by varying the molar percentages of Zn(NO<sub>3</sub>)<sub>2</sub> in preparation (light source: UV light; irradiation period: 90 min).

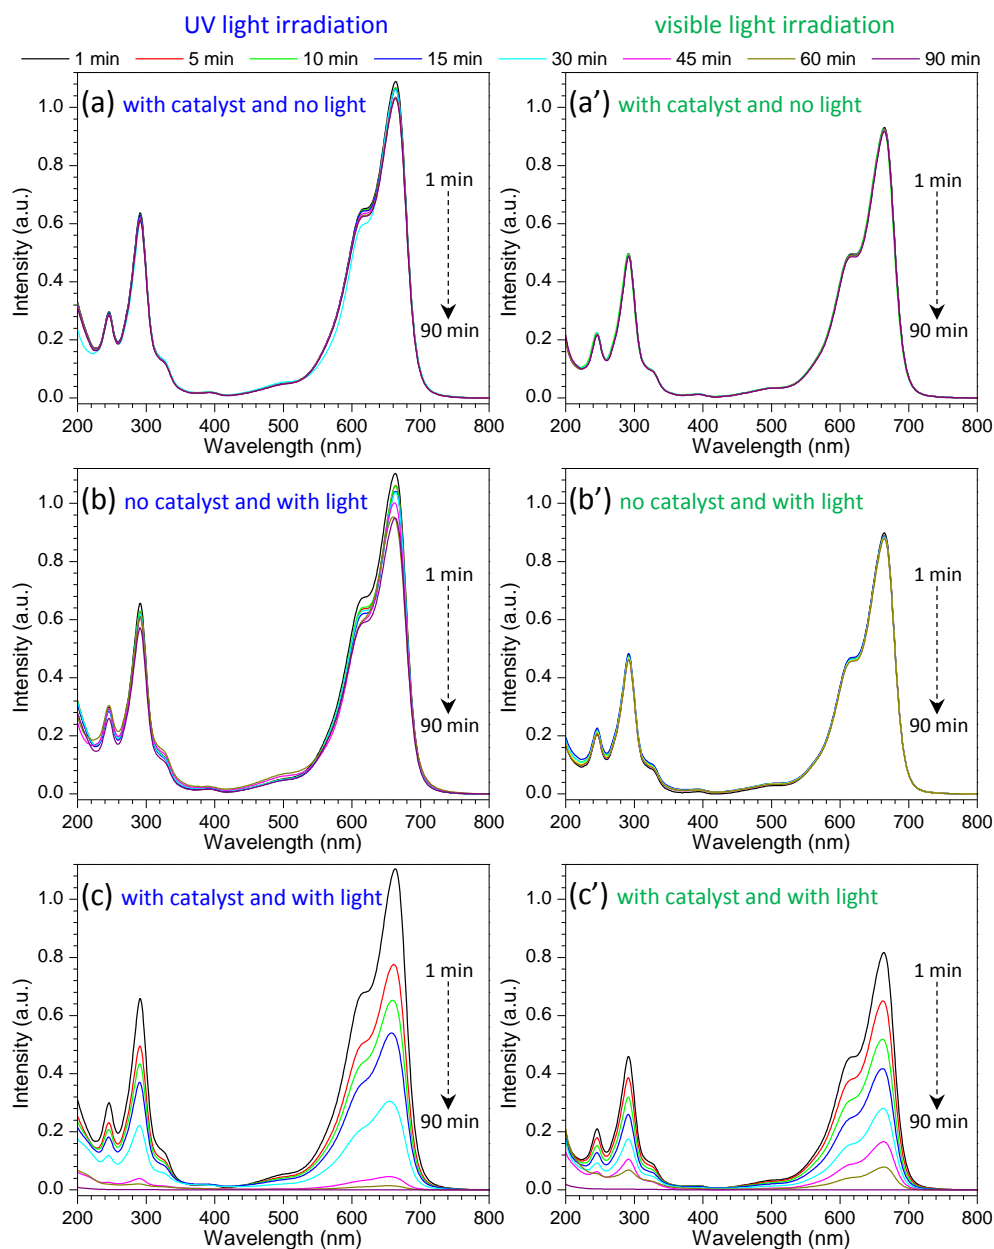

**Figure S2.** UV-vis spectra of methylene blue aqueous solution after treatment under different conditions as marked upon irradiation in [(a), (b) and (c)] UV light (initial concentration: 300 mg L<sup>-1</sup>; solution volume: 50 mL; catalyst amount: 25 mg; irradiation period: 90 min) and [(a'), (b') and (c')] visible light (initial concentration: 100 mg L<sup>-1</sup>; solution volume: 50 mL; catalyst amount: 50 mg; irradiation period: 90 min). It should be mentioned that for the methylene blue solutions after treatment with UV light, they were diluted 50 times prior to the measurement of UV-visible spectrometer, whereas they were diluted 20 times for the system with visible light irradiation.

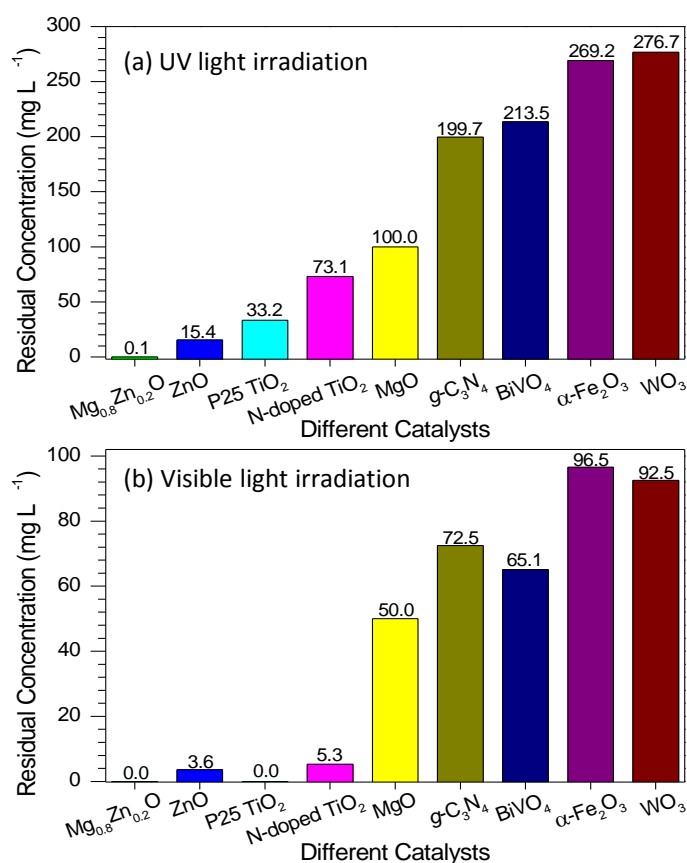

**Figure S3.** Comparison of the performance of developed spherical Mg<sub>0.8</sub>Zn<sub>0.2</sub>O particles with other related state-of-the-art photocatalysts **(a)** in degradation of 50 mL of 300 mg L<sup>-1</sup> methylene blue aqueous solution upon UV light irradiation (irradiation time: 90 min; catalyst amount: 25 mg; solution pH: 4.39) and **(b)** in degradation of 50 mL of 100 mg L<sup>-1</sup> methylene blue aqueous solution upon visible light irradiation (irradiation time: 90 min; catalyst amount: 50 mg; solution pH: 5.47).

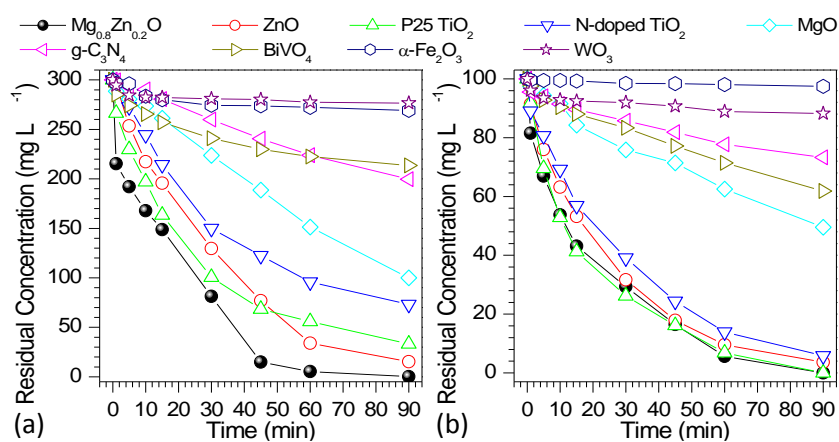

**Figure S4.** Photocatalytic degradation of MB over various photocatalysts upon irradiation in **(a)** UV light (initial concentration: 300 mg L<sup>-1</sup>; solution volume: 50 mL; catalyst amount: 25 mg) and **(b)** visible light (initial concentration: 100 mg L<sup>-1</sup>; solution volume: 50 mL; catalyst amount: 50 mg).

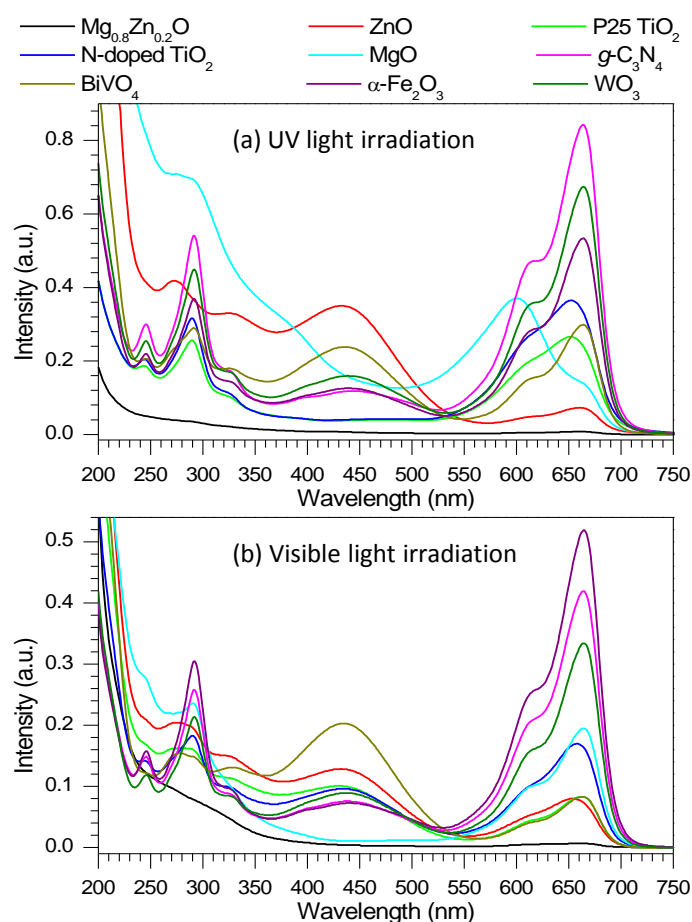

**Figure S5.** UV-vis spectra of 50 mL mixed dye solution (MB, Congo red, thymol blue, bromothymol blue, and eriochrome black T) being treated with  $\text{Mg}_{0.8}\text{Zn}_{0.2}\text{O}$ , ZnO, P25  $\text{TiO}_2$ , N-doped  $\text{TiO}_2$ , MgO,  $g\text{-C}_3\text{N}_4$ ,  $\text{BiVO}_4$ ,  $\alpha\text{-Fe}_2\text{O}_3$ , and  $\text{WO}_3$  upon irradiation in **(a)** UV light (concentration of each dye:  $300 \text{ mg L}^{-1}$ ; catalyst amount: 25 mg; solution pH: 4.39) and **(b)** visible light (concentration of each dye:  $300 \text{ mg L}^{-1}$ ; catalyst amount: 50 mg; solution pH: 5.47) for 90 min.

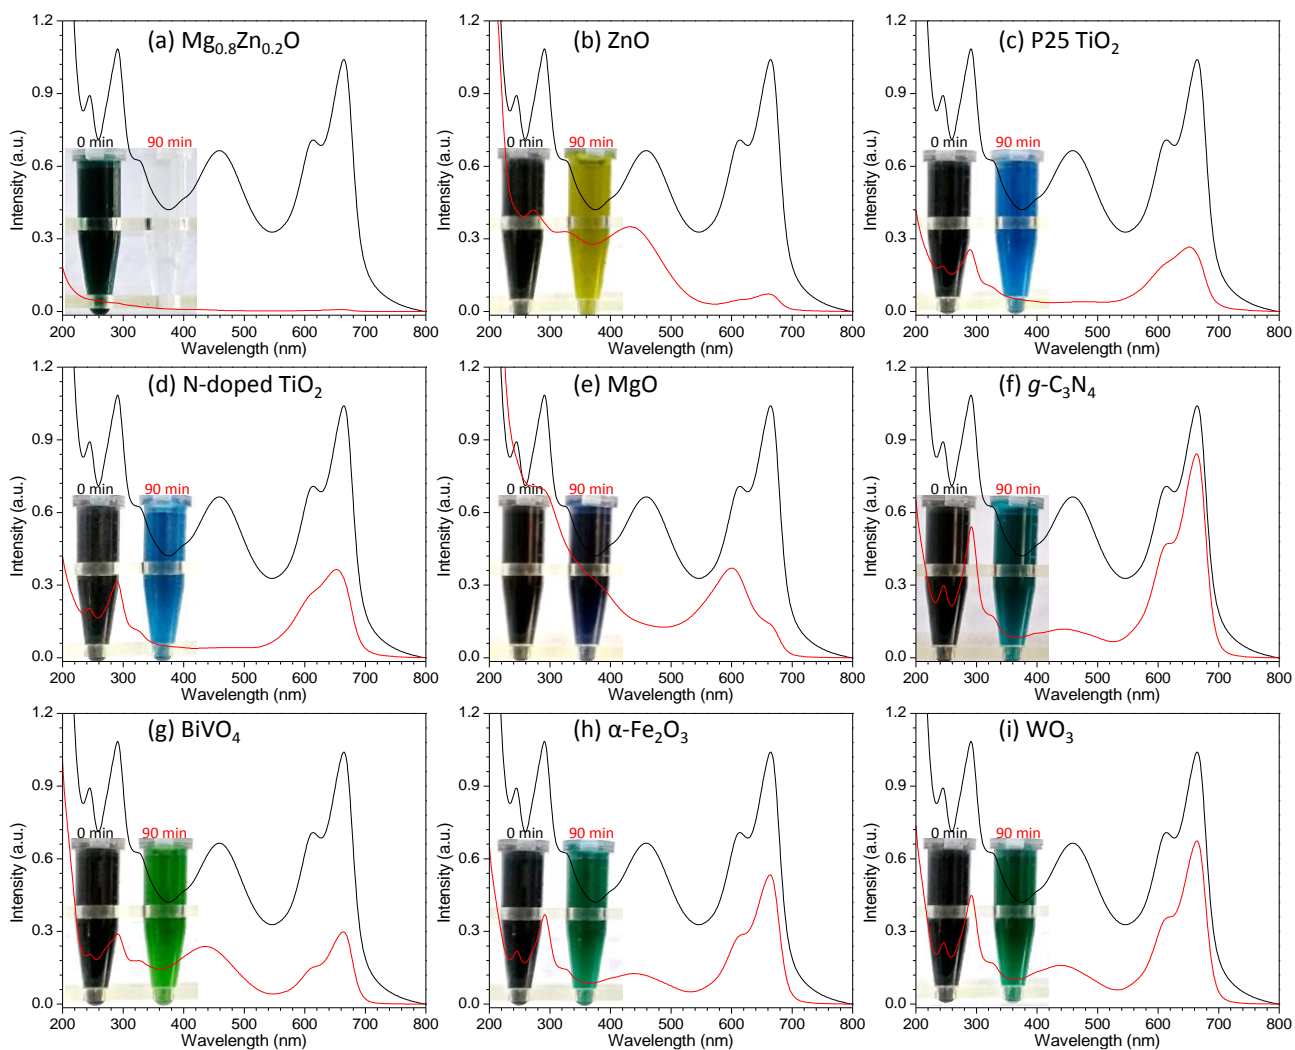

**Figure S6.** UV-vis spectra of 50 mL mixed solution (MB, Congo red, thymol blue, bromothymol blue, and eriochrome black T) with each dye concentration of  $300 \text{ mg L}^{-1}$  being treated with different catalysts: **(a)** spherical  $\text{Mg}_{0.8}\text{Zn}_{0.2}\text{O}$ , **(b)** ZnO, **(c)** P25  $\text{TiO}_2$ , **(d)** N-doped  $\text{TiO}_2$ , **(e)** MgO, **(f)**  $g\text{-C}_3\text{N}_4$ , **(g)**  $\text{BiVO}_4$ , **(h)**  $\alpha\text{-Fe}_2\text{O}_3$ , and **(i)**  $\text{WO}_3$  upon UV light irradiation (— means the solution before treatment, and — means the solution after treatment with 90 min; insets are the photographic images of the corresponding solutions after 0 min and 90 min; catalyst amount: 25 mg).

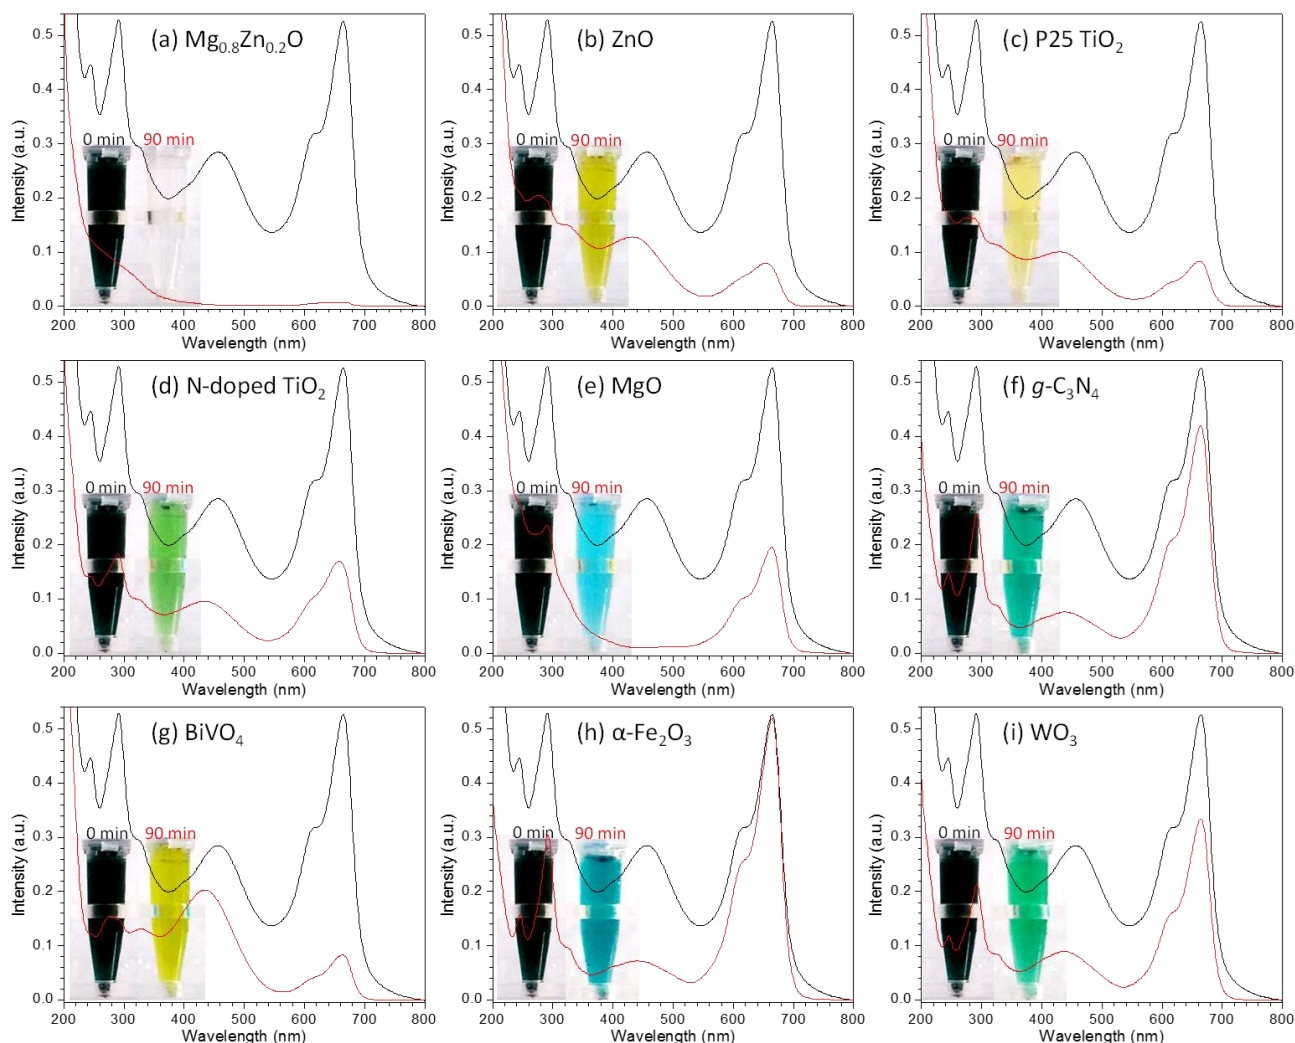

**Figure S7.** UV-vis spectra of 50 mL mixed solution (MB, Congo red, thymol blue, bromothymol blue, and eriochrome black T) with each dye concentration of  $100 \text{ mg L}^{-1}$  being treated with different catalysts: **(a)** spherical  $\text{Mg}_{0.8}\text{Zn}_{0.2}\text{O}$ , **(b)** ZnO, **(c)** P25  $\text{TiO}_2$ , **(d)** N-doped  $\text{TiO}_2$ , **(e)** MgO, **(f)**  $g\text{-C}_3\text{N}_4$ , **(g)**  $\text{BiVO}_4$ , **(h)**  $\alpha\text{-Fe}_2\text{O}_3$ , and **(i)**  $\text{WO}_3$  upon visible light irradiation (— means the solution before treatment, and — means the solution after treatment with 90 min; insets are the photographic images of the corresponding solutions after 0 min and 90 min; catalyst amount: 50 mg).

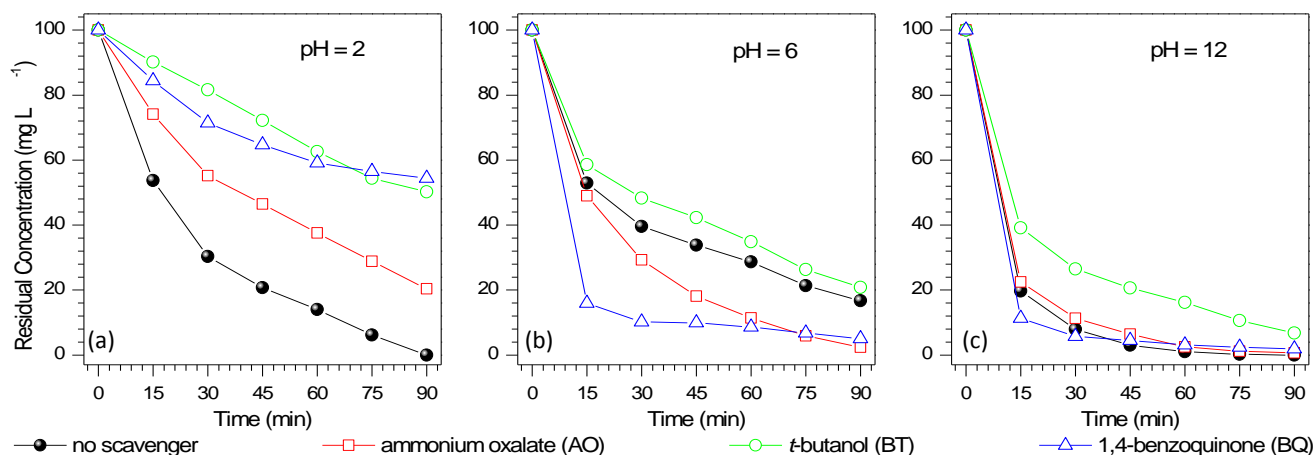

**Figure S8.** Effects of different scavengers on the photocatalytic degradation of methylene blue percentage over developed  $\text{Mg}_{0.8}\text{Zn}_{0.2}\text{O}$  under visible light irradiation with variation in pH values of methylene blue aqueous solutions: (a) pH 2, (b) pH 6, and (c) pH 12 [initial concentration of methylene blue solution:  $100 \text{ mg L}^{-1}$ ; volume: 50 mL; catalytic period: 90 min; catalyst amount: 50 mg; to study the roles of different active species, ammonium oxalate (AO,  $5.0 \text{ mmol L}^{-1}$ ), t-butanol (BT,  $5.0 \text{ mmol L}^{-1}$ ), and 1,4-benzoquinone (BQ,  $1.0 \text{ mmol L}^{-1}$ ) were the scavengers for holes ( $\text{h}^+$ ), hydroxyl radicals ( $\bullet\text{OH}$ ), and superoxide radicals ( $\text{O}_2^{\bullet-}$ ), respectively].

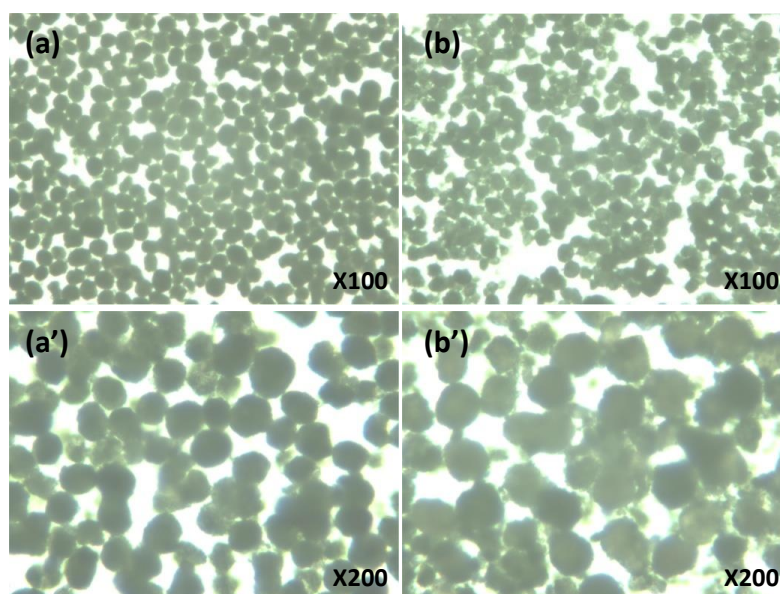

**Figure S9.** Optically microscopic images of (a) and (a') as-synthesized  $\text{Mg}_{0.8}\text{Zn}_{0.2}\text{O}$  (b) without use and (b') the collected product after one cycle for degrading  $100 \text{ mg L}^{-1}$  of methylene blue solution with pH = 2 upon irradiation in visible light.



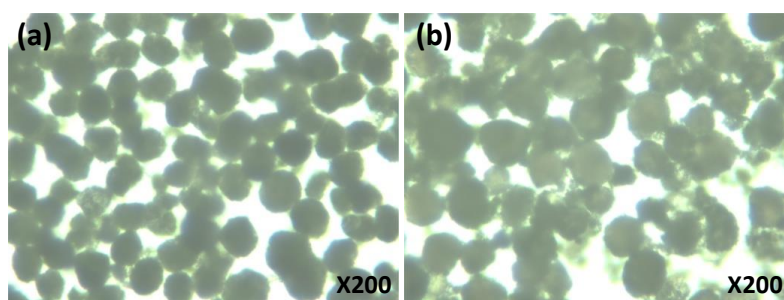

**Figure S10.** *Optically microscopic images of (a) as-synthesized  $Mg_{0.8}Zn_{0.2}O$  without use and (b) the collected product after six recycles for degrading  $100\text{ mg L}^{-1}$  of methylene blue solution upon irradiation in visible light.*

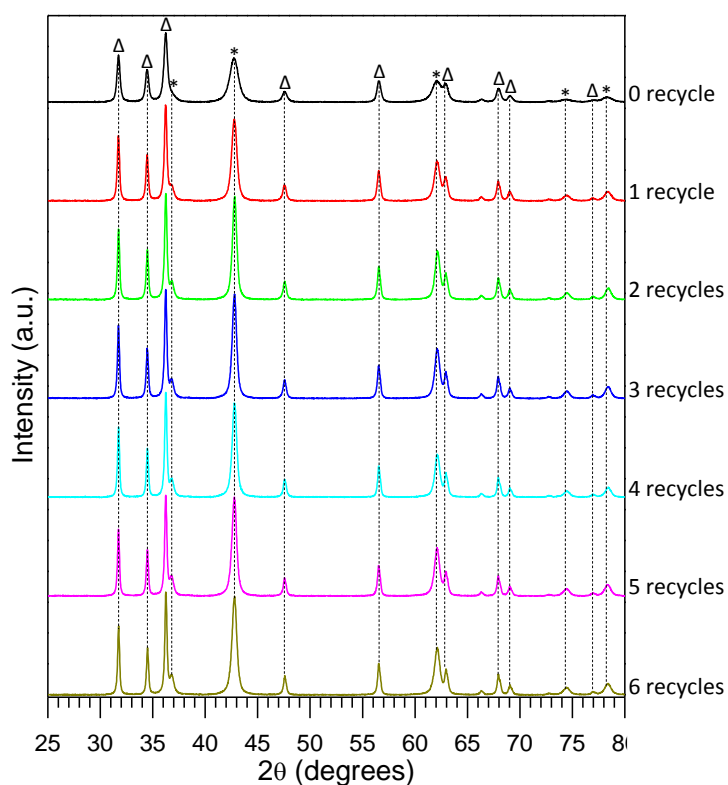

**Figure S11.** *XRD patterns of recycled products as indicated in this figure (note: \* means the diffraction peaks of  $MgO$ , and  $\Delta$  means the diffraction peaks of  $ZnO$  in the products).*

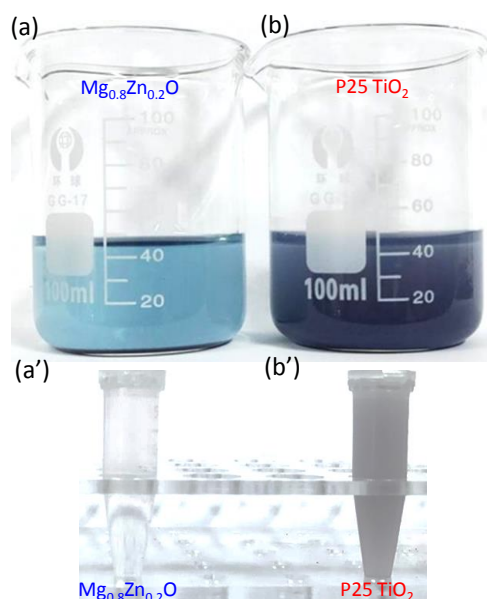

**Figure S12.** Photographic images of 50 mL of 100 mg L<sup>-1</sup> methylene blue solution after being treated with visible light irradiation for 90 min in the presence of **(a)** Mg<sub>0.8</sub>Zn<sub>0.2</sub>O and **(b)** P25 TiO<sub>2</sub> (after photocatalysis, the solutions have been maintained constant for 30 min without any stirring), and the supernatant solutions from the systems with **(c)** Mg<sub>0.8</sub>Zn<sub>0.2</sub>O and **(d)** P25 TiO<sub>2</sub> (catalyst amount: 50 mg).

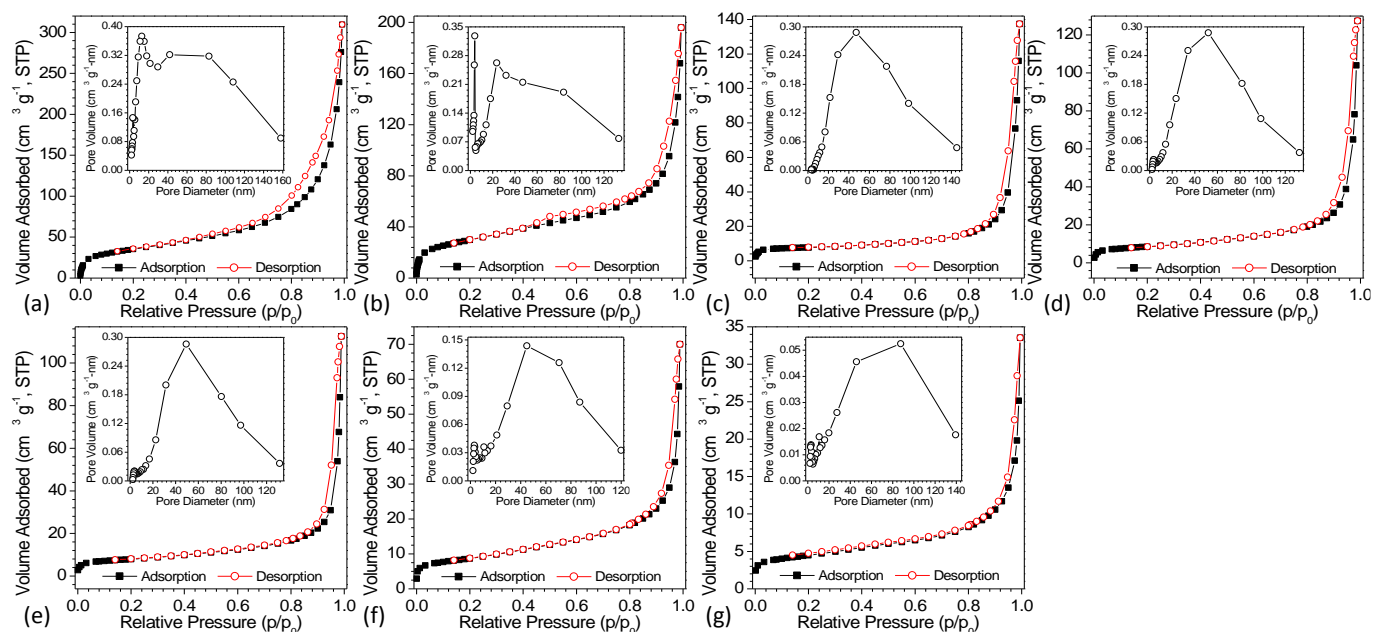

**Figure S13.** N<sub>2</sub> adsorption–desorption isotherms and pore size distributions (insets) of the generated product with different Mg/Zn ratios: **(a)** MgO, **(b)** Mg<sub>0.9</sub>Zn<sub>0.1</sub>O, **(c)** Mg<sub>0.8</sub>Zn<sub>0.2</sub>O, **(d)** Mg<sub>0.7</sub>Zn<sub>0.3</sub>O, **(e)** Mg<sub>0.5</sub>Zn<sub>0.5</sub>O, **(f)** Mg<sub>0.2</sub>Zn<sub>0.8</sub>O, and **(g)** ZnO.

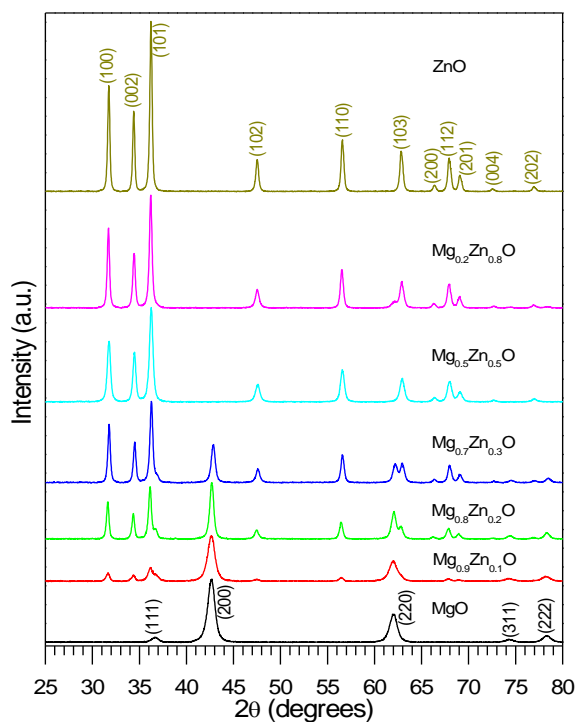

**Figure S14.** XRD patterns of the generated products with different Mg/Zn ratios as indicated in this figure.

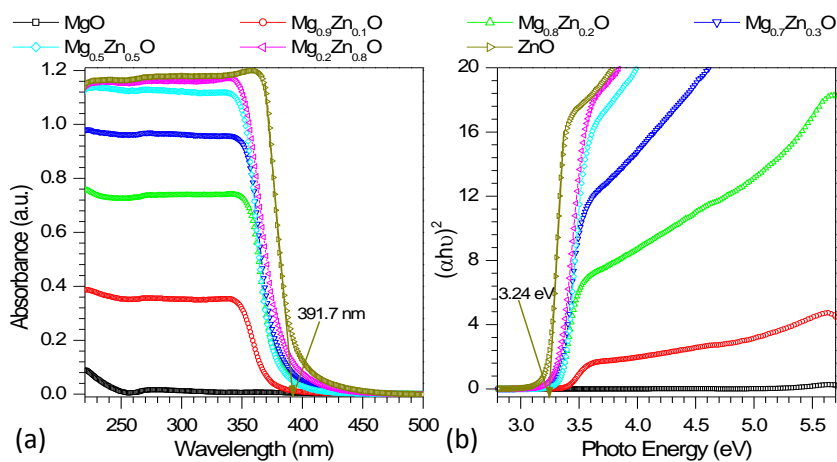

**Figure S15.** (a) UV DRS and (b) plot of  $(\alpha h\nu)^2$  vs  $(h\nu)$  of the generated products with different Mg/Zn ratios as indicated in this figure.

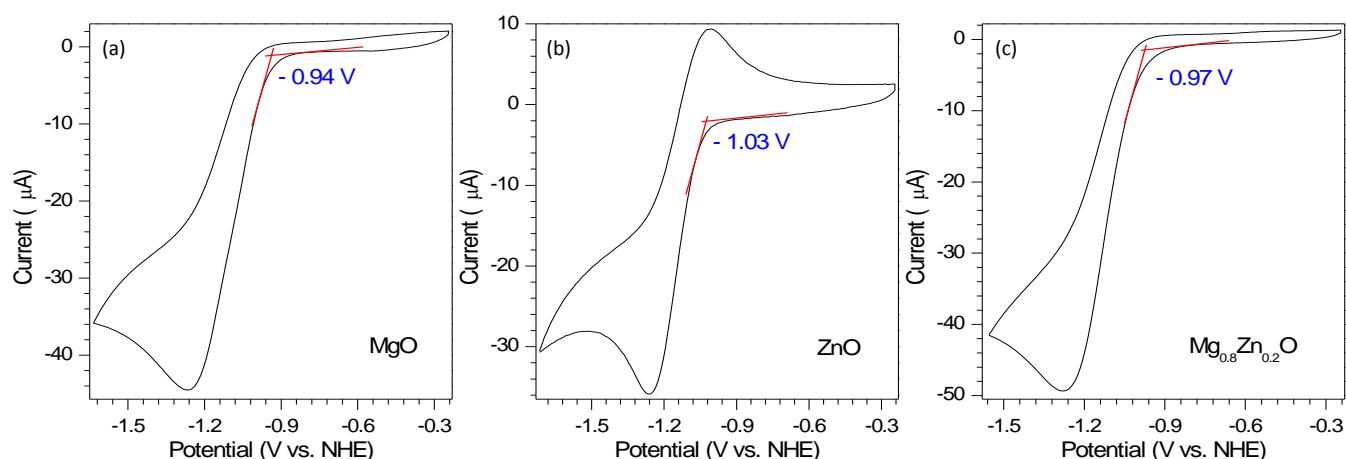

**Figure S16.** Cyclic voltammety measurement for (a) MgO, (b) ZnO, and (c) Mg<sub>0.8</sub>Zn<sub>0.2</sub>O.

**Table S1.** Comparison of different Mg/Zn binary oxides in degradation of organic dyes or others

| Mg/Al oxides                                                           | light         | solution volume | catalyst dosage | dye                                                                           | concentration | Reference           |
|------------------------------------------------------------------------|---------------|-----------------|-----------------|-------------------------------------------------------------------------------|---------------|---------------------|
| Mg <sub>0.8</sub> Zn <sub>0.2</sub> O microspheres                     | UV light      | 50 mL           | 25 mg           | methylene blue, red, thymol bromothymol eriochrome black T and their mixtures | 300 mg/L      | <b>current work</b> |
|                                                                        | visible light | 50 mL           | 50 mg           |                                                                               | 100 mg/L      |                     |
| Mg <sub>0.5</sub> Zn <sub>0.5</sub> O nanoparticles                    | UV light      | 250 mL          | 60 mg           | indigo carmine                                                                | 40 mg/L       | [1]                 |
| Mg <sub>0.8</sub> Zn <sub>0.2</sub> O nanoparticles                    | UV light      | 200 mL          | 50 mg           | methyl orange                                                                 | 20 mg/L       | [2]                 |
| Mg <sub>0.3</sub> Zn <sub>0.7</sub> O thin film                        | UV light      | 100 mL          | n/a             | crystal violet                                                                | 20 mg/L       | [3]                 |
| MgO/ZnO/In <sub>2</sub> O <sub>3</sub> nanoparticles                   | Visible light | 100 mL          | 50 mg           | methylene blue                                                                | 10 mg/L       | [4]                 |
| Mg <sub>0.5</sub> Zn <sub>0.5</sub> O nanoparticles                    | UV light      | 50 mL           | 100 mg          | 2,6-dichlorophenol                                                            | 10 mg/L       | [5]                 |
| MgO/ZnO nanoparticles                                                  | UV light      | 20 mL           | 20 mg           | alprazolam                                                                    | 9 mg/L        | [6]                 |
| Mg <sub>0.904</sub> Zn <sub>0.096</sub> O nanoparticles                | UV light      | 50 mL           | 3 mg            | methylene blue                                                                | 6 mg/L        | [7]                 |
| Mg <sub>0.05</sub> Zn <sub>0.95</sub> O nanoparticles                  | UV light      | 80 mL           | 50 mg           | methylene blue                                                                | 6 mg/L        | [8]                 |
| Mg <sub>0.05</sub> Zn <sub>0.95</sub> O nanoparticles                  | blacklight    | 150 mL          | 150 mg          | methylene blue                                                                | 3 mg/L        | [9]                 |
| Mg <sub>0.10</sub> Zn <sub>0.80</sub> Co <sub>0.10</sub> nanoparticles | UV light      | 100 mL          | 100 mg          | methylene blue                                                                | 3 mg/L        | [10]                |
| Mg <sub>0.10</sub> Zn <sub>0.90</sub> O nanoparticles                  | sunlight      | 50 mL           | 60 mg           | methylene blue                                                                | 3 mg/L        | [11]                |
| Mg <sub>0.05</sub> Zn <sub>0.95</sub> O nanoparticles                  | blacklight    | 150 mL          | 150 mg          | methylene blue                                                                | 3 mg/L        | [12]                |

Note: n/a means not available.

**Table S2.** Comparison of different types of MgO in degradation of organic dyes

| Mg/Al oxides                                       | light         | solution volume | catalyst dosage | dye                                                                                             | concentration | Reference           |
|----------------------------------------------------|---------------|-----------------|-----------------|-------------------------------------------------------------------------------------------------|---------------|---------------------|
| Mg <sub>0.8</sub> Zn <sub>0.2</sub> O microspheres | UV light      | 50 mL           | 25 mg           | methylene blue, Congo red, thymol blue, bromothymol blue, eriochrome black T and their mixtures | 300 mg/L      | <b>current work</b> |
|                                                    | visible light | 50 mL           | 50 mg           |                                                                                                 | 100 mg/L      |                     |
| MgO microspheres                                   | UV light      | 20 mL           | 10 mg           | methylene blue, Congo red, thymol blue, bromothymol blue, eriochrome black T and their mixture  | 100 mg/L      | [13]                |
| MgO nanorods                                       | visible light | 150 mL          | 2 mg            | methylene blue                                                                                  | 25 mg/L       | [14]                |
| MgO nanoparticles                                  | UV light      | 250 mL          | 60 mg           | methylene blue                                                                                  | 20 mg/L       | [15]                |
| MgO nanoparticles                                  | UV light      | 100 mL          | 50 mg           | methyl orange and methylene blue                                                                | 15 mg/L       | [16]                |
| MgO nanospheres                                    | UV light      | 50 mL           | 4 mg            | indigo carmine                                                                                  | 15 mg/L       | [17]                |
| MgO nanoflake                                      | UV light      | 100 mL          | 200 mg          | methyl orange                                                                                   | 10 mg/L       | [18]                |
| MgO nanoflake                                      | UV light      | 25 mL           | 10 mg           | methylene blue                                                                                  | 10 mg/L       | [19]                |
| MgO nanofibre                                      | UV light      | 5 mL            | 20 mg           | reactive yellow                                                                                 | 10 mg/L       | [20]                |
| MgO nanoparticles                                  | UV light      | 50 mL           | 50 mg           | methylene blue, methyl orange, acid orange 7 and rhodamine 6G                                   | 5 mg/L        | [21]                |
| MgO nanoparticles                                  | UV light      | 30 mL           | 50 mg           | methylene blue                                                                                  | 1.8 mg/L      | [22]                |

**Table S3.** Texture properties of different Mg/Zn binary oxides

| Mg/Zn oxides                          | specific surface area <sup>a</sup> (m <sup>2</sup> g <sup>-1</sup> ) | average pore diameter <sup>b</sup> (nm) | pore volume (cm <sup>3</sup> g <sup>-1</sup> ) | crystallite size <sup>c</sup> (nm) | band gap energy <sup>d</sup> (eV) |
|---------------------------------------|----------------------------------------------------------------------|-----------------------------------------|------------------------------------------------|------------------------------------|-----------------------------------|
| MgO                                   | 127.6                                                                | 13.6                                    | 0.48                                           | 8.80                               | 5.24                              |
| Mg <sub>0.9</sub> Zn <sub>0.1</sub> O | 108.3                                                                | 11.0                                    | 0.31                                           | 8.50                               | 3.40                              |
| Mg <sub>0.8</sub> Zn <sub>0.2</sub> O | 26.5                                                                 | 34.2                                    | 0.21                                           | 4.27                               | 3.34                              |
| Mg <sub>0.7</sub> Zn <sub>0.3</sub> O | 29.9                                                                 | 25.7                                    | 0.20                                           | 3.78                               | 3.34                              |
| Mg <sub>0.5</sub> Zn <sub>0.5</sub> O | 27.8                                                                 | 27.4                                    | 0.17                                           | 3.63                               | 3.37                              |
| Mg <sub>0.2</sub> Zn <sub>0.8</sub> O | 30.5                                                                 | 15.2                                    | 0.11                                           | 2.62                               | 3.32                              |
| ZnO                                   | 15.6                                                                 | 17.7                                    | 0.05                                           | 3.96                               | 3.24                              |

Note: <sup>a</sup> Using the standard Brunauer–Emmett–Teller (BET) method. <sup>b</sup> Using the Barret–Joyner–Halenda (BJH) method. <sup>c</sup> Using the Debye–Scherrer formula based on the full width at half-maximum (fwhm) of the (200) plane. <sup>d</sup> Estimated from UV diffused reflectance spectroscopy (DRS).

**Table S4.** The kinetic parameters of ZnO, MgO and Mg<sub>0.8</sub>Zn<sub>0.2</sub>O from their time profiles using the fitting line of Lorentzian function

| oxides                                | y <sub>0</sub> | A       | W     | τ <sub>0</sub> (ns) |
|---------------------------------------|----------------|---------|-------|---------------------|
| ZnO                                   | 0              | 68930.6 | 17.79 | 198.7               |
| MgO                                   | 0              | 59634.2 | 60.70 | 195.7               |
| Mg <sub>0.8</sub> Zn <sub>0.2</sub> O | 0              | 64184.1 | 64.80 | 193.6               |

Note: Lorentzian function is below.

$$y(t) = y_0 + \frac{2A}{\pi} \left[ \frac{W}{4(t - \tau_0)^2 + W^2} \right]$$

## References

- (1) M. Sangeeta, K. V. Karthi, R. Ravishankar, K. S. Anantharaju, H. Nagabhushana, K. Jeetendra, Y. S. Vidya and L. Renuka, *Mater. Today-Process.*, 2017, **4**, 11791-11798.
- (2) J. Lian, C. Zhang, Q. Li and D. H. L. Ng, *Nanoscale*, 2013, **5**, 11672-11678.
- (3) M. Boshta, M. O. Abou-Helal, D. Ghoneim, N. A. Mohsen and R. A. Zaghlool, *Surf. Coat. Technol.*, 2010, **205**, 271-274.
- (4) X. Xiang, L. S. Xie, Z. W. Li and F. Li, *Chem. Eng. J.*, 2013, **221**, 222-229.

- (5) A. I. Vaizogullar, *Kinet. Catal.*, 2018, **59**, 418-427.
- (6) T. B. Ivetić, M. R. Dimitrievska, N. L. Finčur, L. R. Đačanin, I. O. Gúth, B. F. Abramović and S. R. Lukić-Petrović, *Ceram. Int.*, 2014, **40**, 1545-1552.
- (7) A. Sierra-Fernandez, S. C. De la Rosa-Garcia, L. S. Gomez-Villalba, S. Gomez-Cornelio, M. E. Rabanal, R. Fort and P. Quintana, *ACS Appl. Mater. Inter.*, 2017, **9**, 24873-24886.
- (8) X. Qiu, L. Li, J. Zheng, J. Liu, X. Sun and G. Li, *J. Phys. Chem. C*, 2008, **112**, 12242-12248.
- (9) S. Klubnuan, P. Amornpitoksuk and S. Suwanboon, *Mater. Sci. Semicond. Process.*, 2015, **39**, 515-520.
- (10) M. A. Karimi, A. Hatefi-Mehrjardi, A. A. Kabir and M. Zaydabadi, *Res. Chem. Intermed.*, 2015, **41**, 6157-6168.
- (11) V. Etacheri, R. Roshan and V. Kumar, *ACS Appl. Mater. Interfaces*, 2012, **4**, 2717-2725.
- (12) S. Suwanboon, P. Amornpitoksuk, P. Bangrak and N. Muensit, *Ceram. Int.*, 2013, **39**, 5597-5608.
- (13) Y. Zheng, L. Cao, G. Xing, Z. Bai, J. Huang and Z. Zhang, *RSC Adv.*, 2019, **9**, 7338-7348.
- (14) N. Salehifar, Z. Zarghami and M. Ramezani, *Mater. Lett.*, 2016, **167**, 226-229.
- (15) K. N. S. Kumara, H. P. Nagaswarupa, K. R. V. Mahesh, S. C. Prashantha, M. Mylarappa and D. M. K. Siddeshwara, *Nanosyst.-Phys. Chem. Math.*, 2016, **7**, 662-666.
- (16) K. Mageshwari, S. S. Mali, R. Sathyamoorthy and P. S. Patil, *Powder Technol.*, 2013, **249**, 456-462.
- (17) A. B. Gh, M. Sabbaghan and Z. Mirgani, *Spectroc. Acta Pt. A-Molec. Biomolec. Spectr.*, 2015, **137**, 1286-1291.
- (18) R. Sathyamoorthy, K. Mageshwari, S. S. Mali, S. Priyadharshini and P. S. Patil, *Ceram. Int.*, 2013, **39**, 323-330.
- (19) A. Najafi, *Ceram. Int.*, 2017, **43**, 5813-5818.
- (20) M. Mantilaka, R. T. De Silva, S. P. Ratnayake, G. Amaratunga and K. M. N. de Silva, *Mater. Res. Bull.*, 2018, **99**, 204-210.
- (21) M. Y. Guo, A. M. C. Ng, F. Liu, A. B. Djurišić and W. K. Chan, *Appl. Catal. B*, 2011, **107**, 150-157.
- (22) S. Demirci, B. Ozturk, S. Yildirim, F. Bakal, M. Erol, O. Sancakoglu, R. Yigit, E. Celik and T. Batar, *Mater. Sci. Semicond. Process*, 2015, **34**, 154-161.
